# Supplementary material for: Conservation of tandem stop codons in yeasts
Source: Springer Nature journal article supplement (doi:10.1186/gb-2005-6-4-r31), 2005-03-16

**Additional Data file 7**

Frequency of stop codons at each codon location following the real stop codons (a) TAA, (b) TAG and (c) TGA in *Drosophila melanogaster*. The red bars represent the frequency of stop codons at each codon location and the blue bars represent the controls – the frequency of stop codons at the corresponding locations downstream of stop codons in non-coding regions.

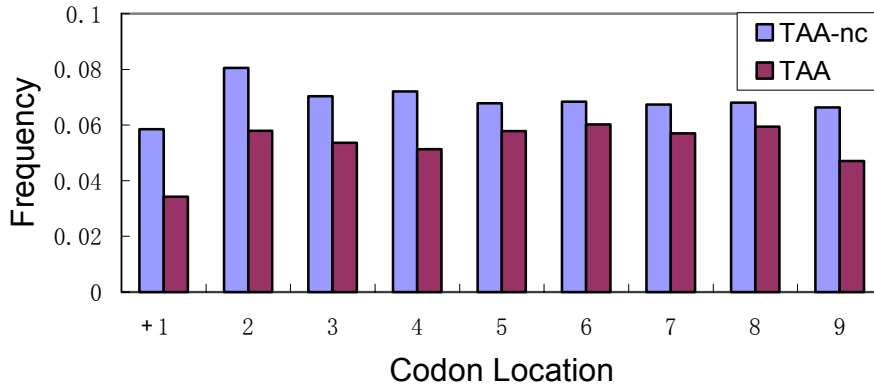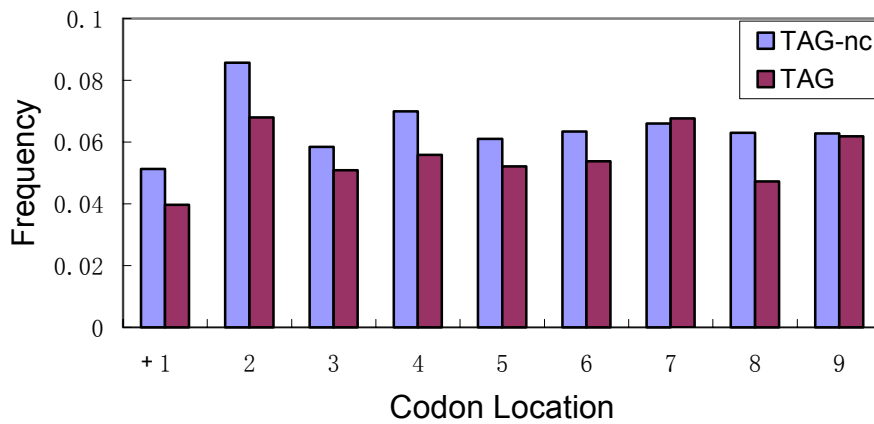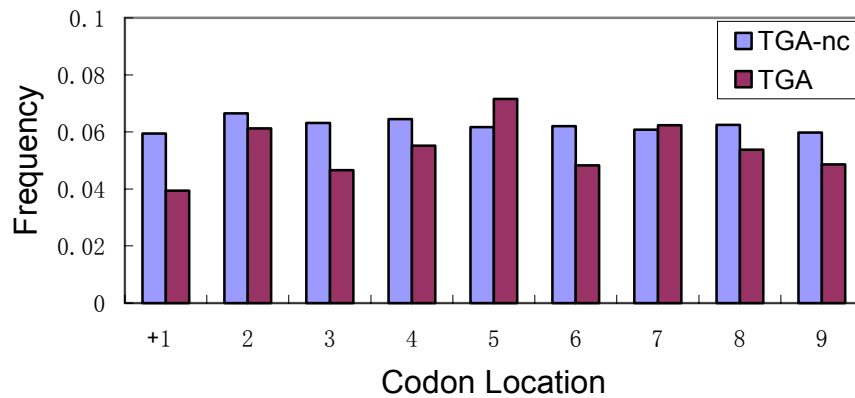

Supplement: Additional file 7 [file gb-2005-6-4-r31-s7.pdf]
