# Supplementary material for: Conservation of tandem stop codons in yeasts
Source: PubMed Central journal article supplement (PMC1088959; doi:10.1186/gb-2005-6-4-r31), 2005-03-15
Supplement: gb-2005-6-4-r31-S3.pdf [file gb-2005-6-4-r31-S3.pdf]

**Additional Data file 3**

Because here we studied many codon locations simultaneously and used a less restrictive P-value cut-off, it is very important to further examine the biological signals in other yeast species. Therefore, over-represented locations were examined. Only in frame codon location **UAA+3** showed the same tendency in all other species.

1. Significant P-values are shown in bold (95% confidence level;  $p < 0.05$ ).
2. Under-represented positions are shown as “n.a.”.

|              |         | <i>S.cerevisiae</i> | <i>S.bayanus</i> | <i>S.mikatae</i> | <i>S.paradoxus</i> | <i>C. glabrata</i> |
|--------------|---------|---------------------|------------------|------------------|--------------------|--------------------|
|              |         | P-value             | P-value          | P-value          | P-value            | P-value            |
| <b>UAA+3</b> | Frame+1 | <b>9E-07</b>        | <b>6E-06</b>     | <b>2E-03</b>     | <b>1E-04</b>       | <b>3E-03</b>       |
| UAG+2        | Frame+1 | 0.053               | n.a.             | 0.3              | 0.9                | 0.5                |
| UAA+1        | Frame+2 | <b>0.005</b>        | 0.5              | 0.1              | <b>0.013</b>       | 0.6                |
| UGA+1        | Frame+2 | <b>0.02</b>         | n.a.             | 0.2              | 0.3                | 0.9                |
