# Supplementary material for: Conservation of tandem stop codons in yeasts
Source: PubMed Central journal article supplement (PMC1088959; doi:10.1186/gb-2005-6-4-r31), 2005-03-15
Supplement: gb-2005-6-4-r31-S9.pdf [file gb-2005-6-4-r31-S9.pdf]

**Additional Data file 9**

Lists of genes with a tandem stop codon in different yeast species.

1. List of genes with a tandem stop codon in *S. cerevisiae*
2. List of genes with a tandem stop codon in *S. bayanus*
3. List of genes with a tandem stop codon in *S. mikatae*
4. List of genes with a tandem stop codon in *S. paradoxus*
5. List of genes with a tandem stop codon in *C. glabrata*

List of genes with a tandem stop codon in *S. cerevisiae*

YAL015C YBL092W YBL045C YBR009C YBR022W YBR026C YBR031W  
YBR033W YBR054W YBR118W YBR153W YBR160W YBR166C YBR176W  
YBR183W YBR242W YBR259W YBR285W YCL048W YCR014C YCR044C  
YCR059C YDL237W YDL233W YDL218W YDL194W YDL192W YDL171C  
YDL136W YDL133C-A YDL105W YDL075W YDL021W YDL014W YDR086C  
YDR090C YDR099W YDR105C YDR120C YDR229W YDR234W YDR292C  
YDR298C YDR302W YDR382W YDR384C YDR410C YDR447C YDR524C  
YEL050C YEL034W YER013W YER019C-A YER061C YER074W YER131W  
YER132C YER177W YFR024C-A YFR029W YFR032C-A YGL190C YGL189C  
YGL186C YGL076C YGL060W YGL030W YGL028C YGL021W YGL008C  
YGR086C YGR126W YGR130C YGR148C YGR162W YGR214W YGR217W  
YGR254W YHR007C YHR017W YHR027C YHR078W YHR089C YHR124W  
YHR179W YHR203C YHR208W YIL142W YIL127C YIL123W YIL116W  
YIL042C YIL018W YIR023W YJL203W YJL201W YJL180C YJR010W  
YJR011C YJR086W YJR104C YJR118C YJR132W YJR145C YKL188C  
YKL129C YKL120W YKL081W YKR055W YKR081C YKR082W YKR095W  
YLL050C YLL036C YLL021W YLR022C YLR029C YLR038C  
YLR044C YLR061W YLR081W YLR134W YLR209C YLR249W YLR258W  
YLR272C YLR286C YLR287C-A YLR292C YLR319C YLR325C YLR344W  
YLR347C YLR385C YLR452C YML115C YML110C YML083C YML063W  
YML026C YML008C YMR029C YMR054W YMR055C YMR060C YMR078C  
YMR099C YMR105C YMR113W YMR131C YMR142C YMR162C YMR258C  
YNL320W YNL308C YNL272C YNL253W YNL213C YNL192W YNL188W  
YNL182C YNL175C YNL131W YNL069C YNL016W YNR016C YNR064C  
YOL148C YOL120C YOL077C YOL058W YOL040C YOL012C YOR064C  
YOR117W YOR130C YOR133W YOR137C YOR232W YOR234C YOR244W  
YOR298W YOR299W YOR369C YOR375C YPL262W YPL249C-A YPL215W  
YPL203W YPL188W YPL143W YPL085W YPL081W YPL075W YPL037C  
YPR020W YPR026W YPR033C YPR057W YPR080W YPR102C YPR183W  
YPR185W YPR193C

List of genes with a tandem stop codon in *S. bayanus*

YAL001C YBL092W YBL039C YBL011W YBR048W YBR061C YBR118W  
YBR211C YBR291C YCR016W YCR044C YCR086W YDL230W YDL227C  
YDL175C YDL149W YDL130W YDL101C YDL090C YDL059C YDL014W  
YDR006C YDR032C YDR050C YDR052C YDR086C YDR097C YDR127W  
YDR147W YDR171W YDR179C YDR221W YDR234W YDR258C YDR301W  
YDR302W YDR356W YDR385W YDR386W YDR447C YDR449C YDR473C  
YDR519W YEL050C YEL026W YER044C YER047C YER049W YER091C  
YER136W YFR031C YGL189C YGL160W YGL135W YGL114W YGL103W  
YGR110W YGR148C YGR162W YGR214W YGR235C YGR264C YGR277C  
YHR007C YHR094C YHR124W YHR134W YHR143W-A YHR156C YHR170W  
YHR203C YIL155C YIL142W YIL111W YIL018W YIR003W YIR026C  
YJL209W YJL201W YJL111W YJL097W YJL051W YJL024C YJL010C  
YJR003C YJR010W YJR069C YJR145C YJR151C YKL172W YKL170W  
YKL151C YKL129C YKL082C YKL001C YKR001C YKR010C YKR082W  
YLL004W YLR029C YLR044C YLR048W YLR074C YLR134W YLR166C  
YLR167W YLR249W YLR275W YLR298C YLR324W YLR335W YLR340W  
YLR347C YLR392C YLR409C YLR433C YLR438W YLR452C YML104C  
YML093W YML063W YML026C YMR033W YMR099C YMR131C YMR183C  
YMR307W YNL211C YNL099C YNL069C YNR019W YNR035C YOL102C  
YOL040C YOL019W YOL014W YOL003C YOR093C YOR096W YOR113W  
YOR117W YOR234C YOR281C YOR287C YOR338W YOR369C YOR375C  
YOR377W YPL145C YPL120W YPL108W YPL096W YPL070W YPL037C  
YPR080W

List of genes with a tandem stop codon in *S. mikatae*

YAL001C YAR002C-A YBL045C YBR031W YBR056W YBR061C YBR118W  
YBR143C YBR160W YBR161W YBR165W YBR215W YBR273C YCR020W-B  
YCR059C YCR073W-A YDL198C YDL104C YDL102W YDL075W YDL064W  
YDL001W YDR120C YDR173C YDR179C YDR229W YDR234W YDR298C  
YDR302W YDR382W YDR384C YDR422C YDR485C YDR486C YER004W  
YER019C-A YER044C YER091C YER105C YER150W YFR001W YFR004W  
YFR032C-A YFR046C YGL242C YGL198W YGL190C YGL189C YGL176C  
YGL166W YGL125W YGL086W YGL080W YGL076C YGL056C YGL008C  
YGL001C YGR078C YGR156W YGR210C YGR214W YGR221C YGR244C  
YGR250C YHL011C YHR007C YHR017W YHR027C YHR051W YHR078W  
YHR089C YHR094C YHR170W YHR176W YIL158W YIL142W YIL135C  
YIL133C YIL123W YIL076W YIL067C YIL018W YIR022W YJL201W  
YJL193W YJL179W YJL159W YJR070C YJR086W YJR145C YKL120W  
YKL088W YKL082C YKL052C YKR008W YKR081C YKR082W YKR100C  
YLL050C YLL049W YLL048C YLR022C YLR204W YLR249W YLR325C  
YLR401C YLR447C YLR449W YML075C YML063W YML049C YML031W  
YMR091C YMR135C YMR225C YMR267W YMR301C YNL329C YNL326C  
YNL272C YNL242W YNL208W YNL204C YNL147W YNL130C YNL069C  
YNR016C YNR024W YNR057C YOL148C YOL102C YOL040C YOR117W  
YOR133W YOR145C YOR232W YOR234C YOR322C YOR348C YOR375C  
YPL249C-A YPL203W YPL188W YPL145C YPR066W YPR080W  
YPR183W

List of genes with a tandem stop codon in *S. paradoxus*

YBL092W YBL086C YBL071W-A YBL066C YBL064C YBL006C YBR009C  
YBR010W YBR023C YBR026C YBR031W YBR054W YBR084W YBR108W  
YBR118W YBR137W YBR143C YBR148W YBR165W YBR176W YBR183W  
YBR259W YCL048W YCL043C YCR017C YCR059C YDL237W YDL233W  
YDL218W YDL204W YDL194W YDL182W YDL171C YDL132W YDL105W  
YDL058W YDL056W YDL021W YDL014W YDR099W YDR105C YDR120C  
YDR128W YDR131C YDR232W YDR298C YDR302W YDR311W YDR365C  
YDR384C YDR447C YDR485C YEL034W YER019C-A YER130C YER132C  
YFR001W YFR032C-A YGL190C YGL189C YGL103W YGL062W YGL060W  
YGL040C YGL008C YGL001C YGR007W YGR015C YGR082W YGR090W  
YGR102C YGR131W YGR148C YGR162W YGR208W YGR214W YGR236C  
YGR254W YHL032C YHR007C YHR017W YHR041C YHR051W YHR065C  
YHR078W YHR091C YHR094C YHR101C YHR170W YHR203C YIL145C  
YIL142W YIL133C YIL123W YIL094C YIL018W YIR023W YJL201W  
YJL144W YJL105W YJL010C YJR010W YJR086W YJR104C YJR145C  
YKL188C YKL120W YKL081W YKR021W YKR081C YKR082W YLL009C  
YLR022C YLR029C YLR044C YLR134W YLR196W YLR249W YLR272C  
YLR275W YLR287C-A YLR325C YLR347C YLR385C YML063W YML004C  
YMR055C YMR099C YMR100W YMR111C YMR121C YMR131C YMR197C  
YMR224C YMR279C YNL272C YNL264C YNL254C YNL225C YNL216W  
YNL213C YNL202W YNL192W YNL188W YNL131W YNL130C YNL083W  
YNR008W YNR016C YOL148C YOL127W YOL058W YOL040C YOR093C  
YOR107W YOR117W YOR133W YOR137C YOR234C YOR244W YOR274W  
YOR287C YOR298W YOR361C YOR369C YOR375C YPL249C-A YPL203W  
YPL173W YPL163C YPL145C YPL085W YPL037C YPL019C YPL001W  
YPR033C YPR066W YPR080W YPR183W

List of genes with a tandem stop codon in *C. glabrata*

GeneID:2886465 GeneID:2886362 GeneID:2886453 GeneID:2886382  
GeneID:2886373 GeneID:2886470 GeneID:2886326 GeneID:2886486  
GeneID:2886385 GeneID:2886275 GeneID:2886444 GeneID:2886292  
GeneID:2886354 GeneID:2886602 GeneID:2886576 GeneID:2886539  
GeneID:2886603 GeneID:2886545 GeneID:2886495 GeneID:2886656  
GeneID:2886628 GeneID:2886810 GeneID:2886834 GeneID:2886802  
GeneID:2886863 GeneID:2886767 GeneID:2886771 GeneID:2886871  
GeneID:2886776 GeneID:2886952 GeneID:2886938 GeneID:2887084  
GeneID:2887162 GeneID:2887031 GeneID:2887011 GeneID:2887185  
GeneID:2887184 GeneID:2887217 GeneID:2887107 GeneID:2887059  
GeneID:2887502 GeneID:2887393 GeneID:2887369 GeneID:2887391  
GeneID:2887274 GeneID:2887285 GeneID:2887334 GeneID:2887373  
GeneID:2887289 GeneID:2887447 GeneID:2887436 GeneID:2887384  
GeneID:2887294 GeneID:2887699 GeneID:2887872 GeneID:2887786  
GeneID:2887961 GeneID:2887974 GeneID:2887769 GeneID:2887686  
GeneID:2887920 GeneID:2887723 GeneID:2887622 GeneID:2887779  
GeneID:2887568 GeneID:2887575 GeneID:2888265 GeneID:2888316  
GeneID:2888270 GeneID:2888247 GeneID:2887990 GeneID:2888331  
GeneID:2888376 GeneID:2888067 GeneID:2888106 GeneID:2888109  
GeneID:2888226 GeneID:2888357 GeneID:2888084 GeneID:2888041  
GeneID:2888043 GeneID:2888036 GeneID:2888391 GeneID:2888156  
GeneID:2888692 GeneID:2888460 GeneID:2888831 GeneID:2888879  
GeneID:2888596 GeneID:2888584 GeneID:2888848 GeneID:2888791  
GeneID:2888671 GeneID:2888770 GeneID:2888765 GeneID:2888591  
GeneID:2888469 GeneID:2888659 GeneID:2888677 GeneID:2888530  
GeneID:2889308 GeneID:2889300 GeneID:2889044 GeneID:2889041  
GeneID:2888910 GeneID:2889332 GeneID:2888956 GeneID:2889382  
GeneID:2889384 GeneID:2889387 GeneID:2889022 GeneID:2889024  
GeneID:2889148 GeneID:2889360 GeneID:2889085 GeneID:2889197  
GeneID:2889131 GeneID:2889066 GeneID:2889061 GeneID:2889189  
GeneID:2889217 GeneID:2888972 GeneID:2888978 GeneID:2889230  
GeneID:2889279 GeneID:2889400 GeneID:2889882 GeneID:2889817  
GeneID:2889795 GeneID:2889760 GeneID:2889736 GeneID:2889740  
GeneID:2889725 GeneID:2889688 GeneID:2889644 GeneID:2889651  
GeneID:2889637 GeneID:2889556 GeneID:2889558 GeneID:2889564  
GeneID:2889503 GeneID:2889769 GeneID:2889781 GeneID:2889620  
GeneID:2889631 GeneID:2889575 GeneID:2889858 GeneID:2889601  
GeneID:2889602 GeneID:2889485 GeneID:2889489 GeneID:2889468  
GeneID:2890190 GeneID:2890514 GeneID:2890030 GeneID:2890516  
GeneID:2890039 GeneID:2889990 GeneID:2890502 GeneID:2890491  
GeneID:2890477 GeneID:2890455 GeneID:2890435 GeneID:2890410  
GeneID:2890388 GeneID:2890383 GeneID:2890341 GeneID:2890295  
GeneID:2890213 GeneID:2890119 GeneID:2890108 GeneID:2890530  
GeneID:2889970 GeneID:2889987 GeneID:2890423 GeneID:2891108

GeneID:2890935 GeneID:2890941 GeneID:2890920 GeneID:2890678  
GeneID:2890854 GeneID:2890726 GeneID:2890773 GeneID:2890704  
GeneID:2890707 GeneID:2890723 GeneID:2890812 GeneID:2890752  
GeneID:2890753 GeneID:2890654 GeneID:2890991 GeneID:2890996  
GeneID:2890559 GeneID:2891122 GeneID:2891032 GeneID:2890957  
GeneID:2890961 GeneID:2890944 GeneID:2890700 GeneID:2890599  
GeneID:2890588 GeneID:2891148 GeneID:2891604 GeneID:2891191  
GeneID:2891482 GeneID:2891506 GeneID:2891621 GeneID:2891569  
GeneID:2891632 GeneID:2891636 GeneID:2891652 GeneID:2891659  
GeneID:2891666 GeneID:2891673 GeneID:2891678 GeneID:2891701  
GeneID:2891736 GeneID:2891742 GeneID:2891745 GeneID:2891260  
GeneID:2891279 GeneID:2891290 GeneID:2891303 GeneID:2891317  
GeneID:2891323 GeneID:2891334 GeneID:2891348 GeneID:2891374  
GeneID:2891394 GeneID:2891450 GeneID:2891198 GeneID:2891211  
GeneID:2891234
